# Supplementary material for: Plasma miR-200b in ovarian carcinoma patients: distinct pattern of pre/post-treatment variation compared to CA-125 and potential for prediction of progression-free survival
Source: PubMed Central journal article supplement (PMC4742212; doi:10.18632/oncotarget.5766), 2015-09-21
Supplement: oncotarget-06-36815-s001.pdf [file oncotarget-06-36815-s001.pdf]

**Plasma miR-200b in ovarian carcinoma patients: distinct pattern of pre/post-treatment variation compared to CA-125 and potential for prediction of progression-free survival**

**Supplementary Material**

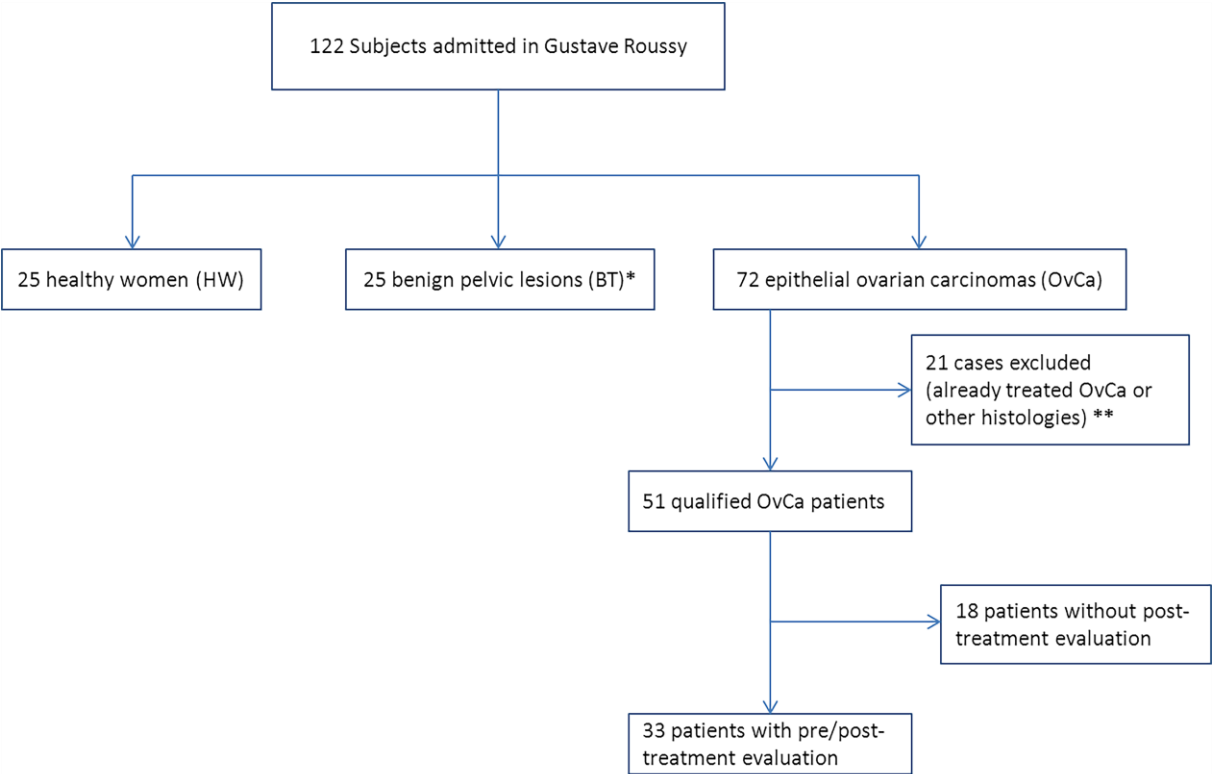

Figure 1: Flow-chart of the subjects included in the study.

\*Most cases of BT were ovarian cystadenofibromas, leiomyomas, teratomas, fibrothecomas or various cysts which, after microscopical analysis of the biopsies, were shown to be non-malignant.

\*\*Sixteen cases had received a treatment prior to the first coelioscopy or suffered a cancer within the two last years before the detection of the OvCa. Two patients were excluded, as the tumor was classified as borderline upon histopathological examination. Finally, 3 cases of ovarian tumors were proven to be the result of breast or colon cancer metastases.

Table 1: Candidate miRNAs selected for our experimental procedure.

| <b>microRNA</b> | <b>Material</b> | <b>Type of aberration</b> | <b>Reference</b> |
|-----------------|-----------------|---------------------------|------------------|
| miR-21          | Plasma, Serum   | Increased                 | [1, 2]           |
| miR-34a         | Serum           | Increased                 | [1, 3]           |
| miR-200b        | Serum           | Increased                 | [3, 4]           |
| miR-205         | Plasma          | Increased                 | [3, 5]           |

### Introduction to Figure 2 - Selection of endogenous reference

Quantitative assessment of microRNAs by real-time PCR requires endogenous references to avoid biases due to RNA extraction and reverse transcription efficiency. Therefore, during preliminary studies, we investigated the potential of 3 miRNAs – hsa-miR-132-3p, hsa-miR-23a-3p and hsa-miR-191-5p – already used for normalization of plasma microRNAs in published studies [1, 6]. Our main selection criteria were their detection at a substantial and consistent level among our 3 groups of plasma samples (HW, BT, OvCa). The consistency of their concentration was evaluated by comparison of the median Ct value using the Kruskal-Wallis test. MiR-132 was rapidly eliminated because of being poorly detected in the majority of the control as well as OvCa subjects (data not shown). MiR-23a was readily detected in most plasma samples but was in fact dependent on the disease state ( $p$ -value = 0.036). In contrast, the average level of miR-191 was consistent in plasma samples from all 3 categories of donors (median values 31.91, 32.54 and 32.46 for HW, BT and OvCa respectively,  $p$ -value = 0.13). Therefore, miR-191 was chosen for data normalization (see Figure 2 below).

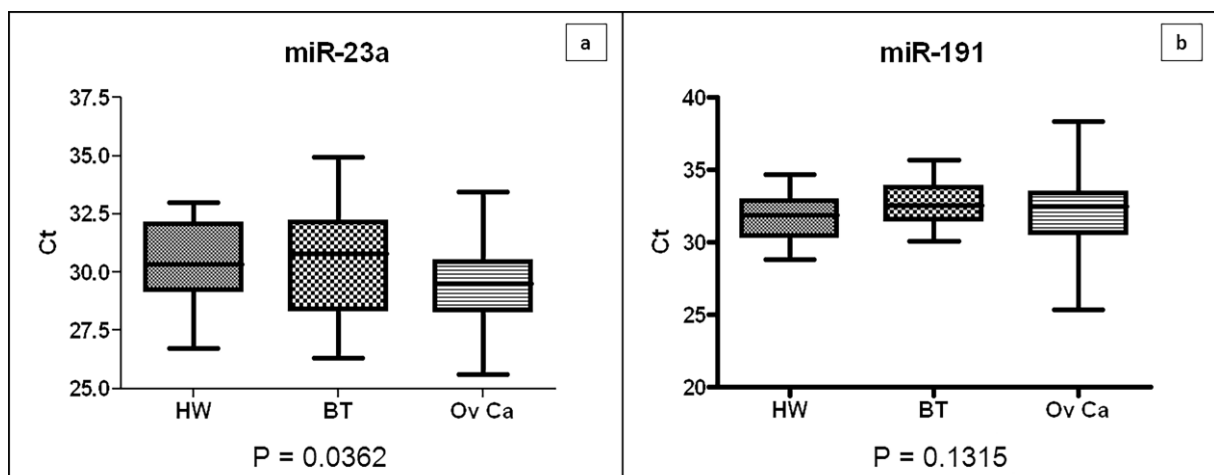

Figure 2: Comparison of miR-23a (a) and miR-191 (b) Ct values in the series of plasma samples from healthy women (HW), women with benign tumors or lesions (BT) and ovarian cancers (OvCa) ( $N_{HW}=25$ ,  $N_{BT}=25$ ,  $N_{OvCa}=51$ ). Ct (cycle threshold) reflects the concentration of targeted miRNAs in each plasma sample (high Ct - low abundance). For miR-23a, the median values for HW, BT and OvCa were significantly different with 30.35, 30.80 and 29.49 respectively. For miR-191, they were not significantly different with 31.91, 32.54 and 32.46 respectively. The reported  $p$ -values are corrected for multiple testing. The horizontal line in the box interior represents the median.

Table 2: Real-time PCR cycle conditions

| <b>Process step</b>                | <b>Settings</b>                                                                     |
|------------------------------------|-------------------------------------------------------------------------------------|
| Polymerase Activation/Denaturation | 95°C, 10 minutes                                                                    |
| Amplification                      | 40 cycles at 95°C for 10 seconds and 60°C for 1 minute, with a ramp-rate of 1.6°C/s |
| Melting Curve                      | Included                                                                            |

Table 3: Full name, accession number and Exiqon primers' reference number of each of the studied microRNAs.

| <b>microRNA</b> | <b>miRBase Accession Number</b> | <b>Exiqon Product Number</b> |
|-----------------|---------------------------------|------------------------------|
| hsa-miR-21-5p   | MIMAT0000076                    | 204230                       |
| hsa-miR-23a-3p  | MIMAT0000078                    | 204772                       |
| hsa-miR-34a-5p  | MIMAT0000255                    | 204486                       |
| hsa-miR-132-3p  | MIMAT0000426                    | 204129                       |
| hsa-miR-191-5p  | MIMAT0000440                    | 204306                       |
| hsa-miR-200-3p  | MIMAT0000318                    | 206071                       |
| hsa-miR-205-5p  | MIMAT0000266                    | 204487                       |

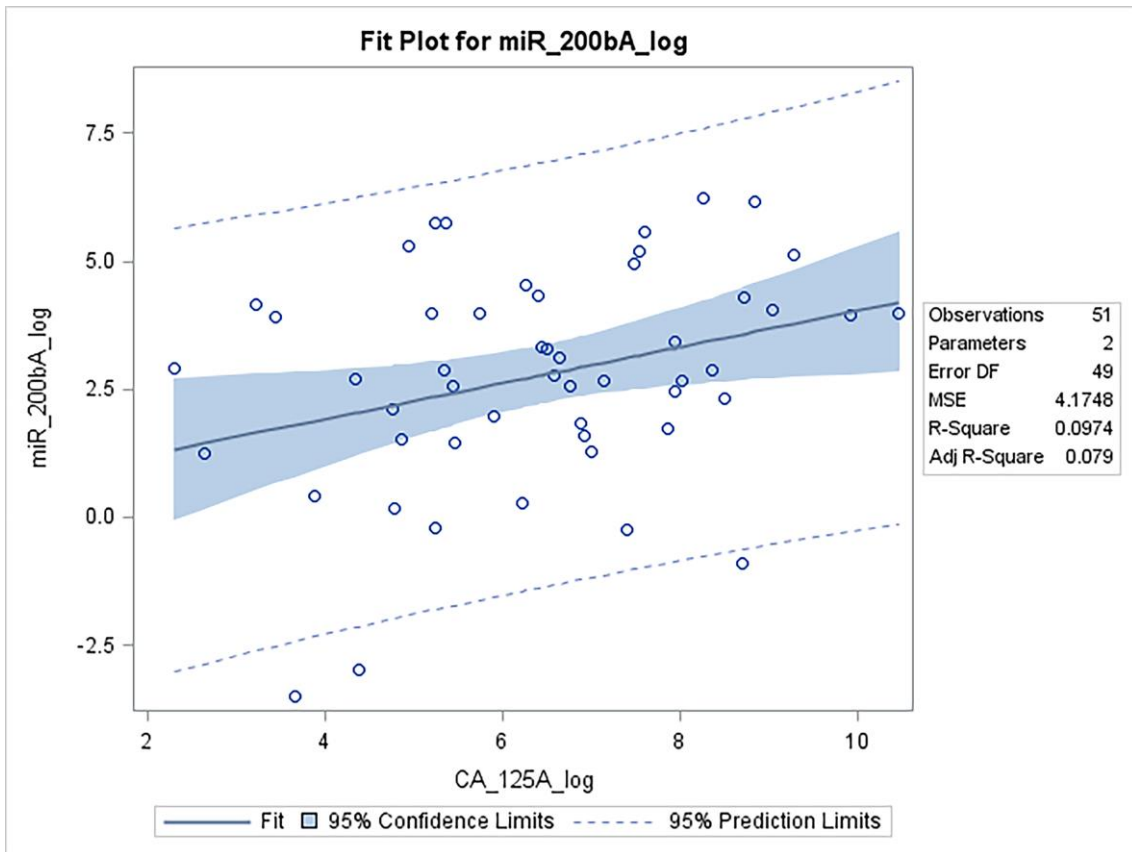

Figure 3: Plot of miR-200b versus CA-125 after log transformation:  $R^2 = 0.0974$  ( $N=51$ ).

Table 4: Correlation between CA-125, miR-200b measured prior to treatment and age, FIGO stage in ovarian cancer patients ( $N=51$ ). Reported  $p$ -values (Kruskal-Wallis test) are not corrected for multiple testing.

|             |                      | CA-125<br>Median [Q1; Q3]                    | miR-200b<br>Median [Q1; Q3]            |
|-------------|----------------------|----------------------------------------------|----------------------------------------|
| Age (years) | <65 ( $N=29$ )       | 600.0 [190.0; 1652.0]                        | 17.7 [10.0; 53.8]                      |
|             | $\geq 65$ ( $N=22$ ) | 1038.0 [119.0; 3058.0]<br>$p$ -value= 0.6345 | 16.0 [1.5; 73.6]<br>$p$ -value= 0.4936 |
| Stage FIGO  | I, II ( $N=6$ )      | 130.0 [49.0; 212.0]                          | 48.5 [1.5; 202.7]                      |
|             | III, IV ( $N=45$ )   | 865.0 [211.0; 2858.0]<br>$p$ -value= 0.0119  | 17.5 [6.3; 53.8]<br>$p$ -value=0.9301  |

Table 5: Individual fold changes in the concentrations of CA-125 and miR-200b in the samples collected before and after the primary treatment of OvCa patients ( $N=33$ ).

| Patient | CA-125 (U/ml) |             | miR-200b ( $2^{-\Delta\Delta Ct}$ ) |             |
|---------|---------------|-------------|-------------------------------------|-------------|
|         | Concentration | Fold change | Concentration                       | Fold change |
| Exo 12* | 10→34         | x 3.4       | 18.4→53.1                           | x 2.9       |
| Exo 15  | 3058→20       | 1/153       | 14.5→6.7                            | 1/2.2       |
| Exo 18  | 90→5          | 1/18        | 13.1→97.8                           | x 7.5       |
| Exo 25  | 2600→9.2      | 1/283       | 5.6→0.01                            | 1/560       |
| Exo 35  | 313→6         | 1/52        | 53.1→58.2                           | x 1.1       |
| Exo 43  | 2819→41       | 1/69        | 30.3→250.0                          | x 8.3       |
| Exo 45  | 212→11        | 1/19        | 308.0→54.6                          | 1/6         |
| Exo 49  | 211→7         | 1/30        | 17.5→24.9                           | x 1.4       |
| Exo 50  | 190→16        | 1/12        | 308.5→420.3                         | x 1.4       |
| Exo 51  | 184→18        | 1/10        | 53.8→3.0                            | 1/18        |
| Exo 54  | 235→8         | 1/29        | 4.3→19.5                            | x 4.5       |
| Exo 58  | 600→30        | 1/20        | 74.6→0.04                           | 1/1865      |
| Exo 59  | 10816→26      | 1/416       | 165.7→32.4                          | 1/5         |
| Exo 64  | 2009→20       | 1/101       | 263.5→199.6                         | 1/1.3       |
| Exo 69  | 20392→57      | 1/358       | 52.4→239.6                          | x 4.6       |
| Exo 72  | 1900→7        | 1/271       | 177.9→20.6                          | 1/9         |
| Exo 74  | 31,4→6.7      | 1/5         | 50.0→7.3                            | 1/7         |
| Exo 75  | 25→4          | 1/6         | 64.0→14.6                           | 1/4.4       |
| Exo 79  | 2858→213      | 1/13        | 11.8→311.8                          | x 26.4      |
| Exo 85  | 8455→1600     | 1/5         | 58.2→136.8                          | x 2.4       |
| Exo 103 | 1264→10       | 1/126       | 14.4→22.0                           | x 1.5       |
| Exo 121 | 507→7.4       | 1/69        | 1.32→1.32                           | x 1         |
| Exo 122 | 4269→40       | 1/107       | 17.65→1.31                          | x 13.5      |
| Exo 129 | 3861→6        | 1/644       | 504.4→166.0                         | 1/3.0       |
| Exo 130 | 625→3.2       | 1/195       | 27.7→104.9                          | x 3.8       |
| Exo 133 | 521.5→26      | 1/20        | 93.4→67.7                           | 1/1.4       |
| Exo 140 | 81→8          | 1/10        | 0.1→0.3                             | x 3         |
| Exo 141 | 6900→41.6     | 1/166       | 480.0→480.6                         | x 1         |
| Exo 145 | 39→12         | 1/3         | 0.03→13.2                           | x 440       |
| Exo 153 | 130→31.6      | 1/4         | 4.6→48.2                            | x 10.5      |
| Exo 158 | 49→14         | 1/4         | 1.52→0.51                           | 1/3.0       |
| Exo 169 | 141→8.2       | 1/17        | 202.7→4.4                           | 1/46        |
| Exo 178 | 1015→110.3    | 1/9         | 4,89→2.06                           | 1/2.4       |

\*The patients are named according to their order of induction in the project.



## References

1. Suryawanshi S, Vlad AM, Lin HM et al. Plasma microRNAs as novel biomarkers for endometriosis and endometriosis-associated ovarian cancer. *Clin Cancer Res* 2013; 19: 1213-1224.
2. Resnick KE, Alder H, Hagan JP et al. The detection of differentially expressed microRNAs from the serum of ovarian cancer patients using a novel real-time PCR platform. *Gynecol Oncol* 2009; 112: 55-59.
3. Taylor DD, Gercel-Taylor C. MicroRNA signatures of tumor-derived exosomes as diagnostic biomarkers of ovarian cancer. *Gynecol Oncol* 2008; 110: 13-21.
4. Kan CW, Hahn MA, Gard GB et al. Elevated levels of circulating microRNA-200 family members correlate with serous epithelial ovarian cancer. *BMC Cancer* 2012; 12: 627.
5. Zheng H, Zhang L, Zhao Y et al. Plasma miRNAs as diagnostic and prognostic biomarkers for ovarian cancer. *PLoS One* 2013; 8: e77853.
6. Shapira I, Oswald M, Lovecchio J et al. Circulating biomarkers for detection of ovarian cancer and predicting cancer outcomes. *Br J Cancer* 2014; 110: 976-983.
